# Supplementary material for: Hematopoietic and mesenchymal stem cells: polymeric nanoparticle uptake and lineage differentiation
Source: publisher site journal article supplement (doi:10.3762/bjnano.6.38), 2015-02-05
Supplement: Additional file 1 [file 2190-4286-6-38-S1.pdf]

Supporting Information

for

## **Hematopoietic and mesenchymal stem cells: polymeric nanoparticle uptake and lineage differentiation**

Ivonne Brüstle<sup>1</sup>, Thomas Simmet<sup>2</sup>, Gerd Ulrich Nienhaus<sup>3,4,5</sup>, Katharina Landfester<sup>1</sup>, Volker Mailänder\*<sup>1,6</sup>

Address: <sup>1</sup>Max-Planck-Institute for Polymer Research, Ackermannweg 10, 55128 Mainz, Germany, <sup>2</sup>Institute of Pharmacology of Natural Products & Clinical Pharmacology, Ulm University, Helmholtzstraße 20, 89081 Ulm, Germany, <sup>3</sup>Institute of Applied Physics, Karlsruhe Institute of Technology (KIT), Wolfgang-Gaede-Straße 1, 76131 Karlsruhe, Germany, <sup>4</sup>Institute of Toxicology and Genetics (ITG), Karlsruhe Institute of Technology (KIT), Hermann-von-Helmholtz-Platz 1, 76344 Eggenstein-Leopoldshafen, Germany, <sup>5</sup>Department of Physics, University of Illinois at Urbana-Champaign, Urbana, Illinois 61801, USA and <sup>6</sup>3rd Department of Medicine (Hematology, Oncology, and Pneumology), University Medical Center of the Johannes Gutenberg-University Mainz, Langenbeckstraße 1, 55131 Mainz, Germany,

Email: Volker Mailänder\* - volker.mailaender@mpip-mainz.mpg.de

\*Corresponding Author

## Additional experimental results and material characterization

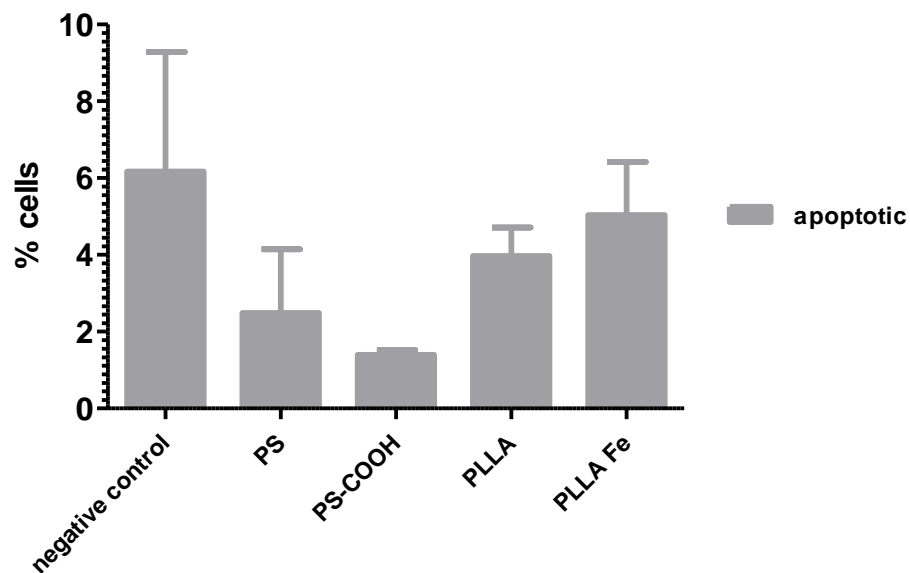

**Figure S1:** Amount of apoptotic cells after incubation with indicated nanoparticles. As this is low and the apoptotic fraction is not enhanced in quantity the investigated nanoparticles can be considered to be safe.

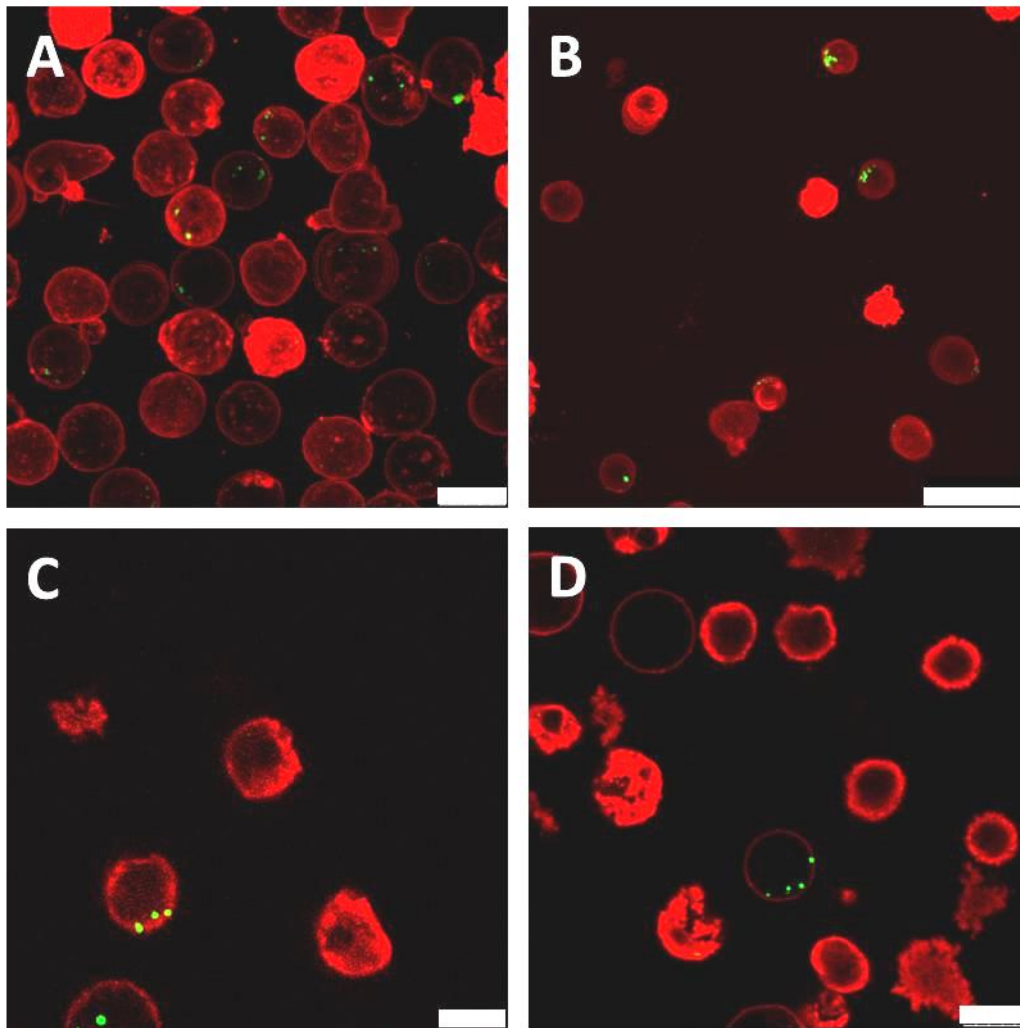

**Figure S2:** (A) PS (B) PS-COOH (C) PLLA (D) PLLA-Fe particles in hHSCs. The cell membrane is pseudo-colored in red, nanoparticles are pseudo-colored in green. Scale bars are 10  $\mu\text{m}$  for (A), (C) and (D); for (B) scale bar is 25  $\mu\text{m}$ .

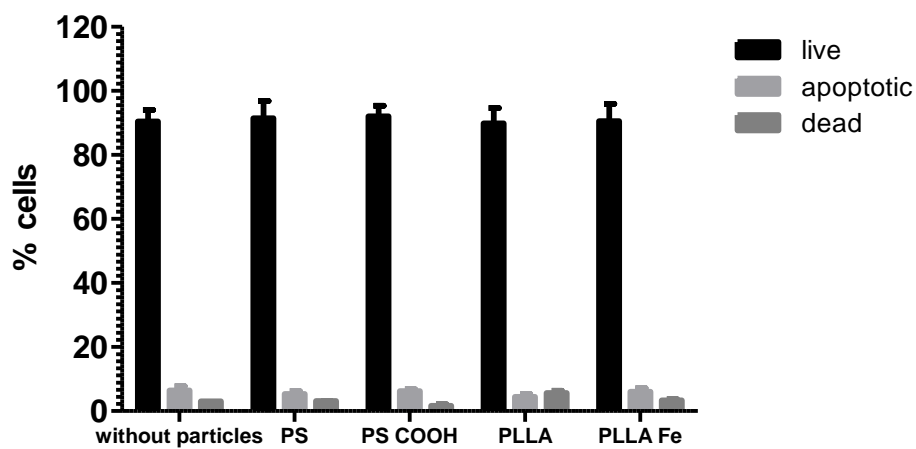

**Figure S3:** Cytotoxicity of the particles after 24 h incubation with 300  $\mu\text{g/mL}$  nanoparticles analyzed by 7-AAD staining and flow cytometry.

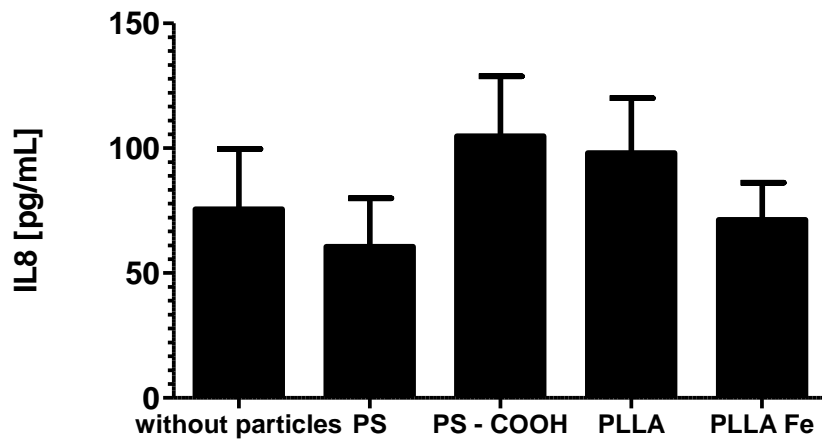

**Figure S4:** IL-8 secretion of hHSCs. Measurement was done in the supernatant of cells that have been incubated for 24 h with 300 $\mu$ g/mL nanoparticles, washed three times with PBS and cultivated for 5 days in medium with SCF and Flt at the end of this period. The differences were not statistically significant.

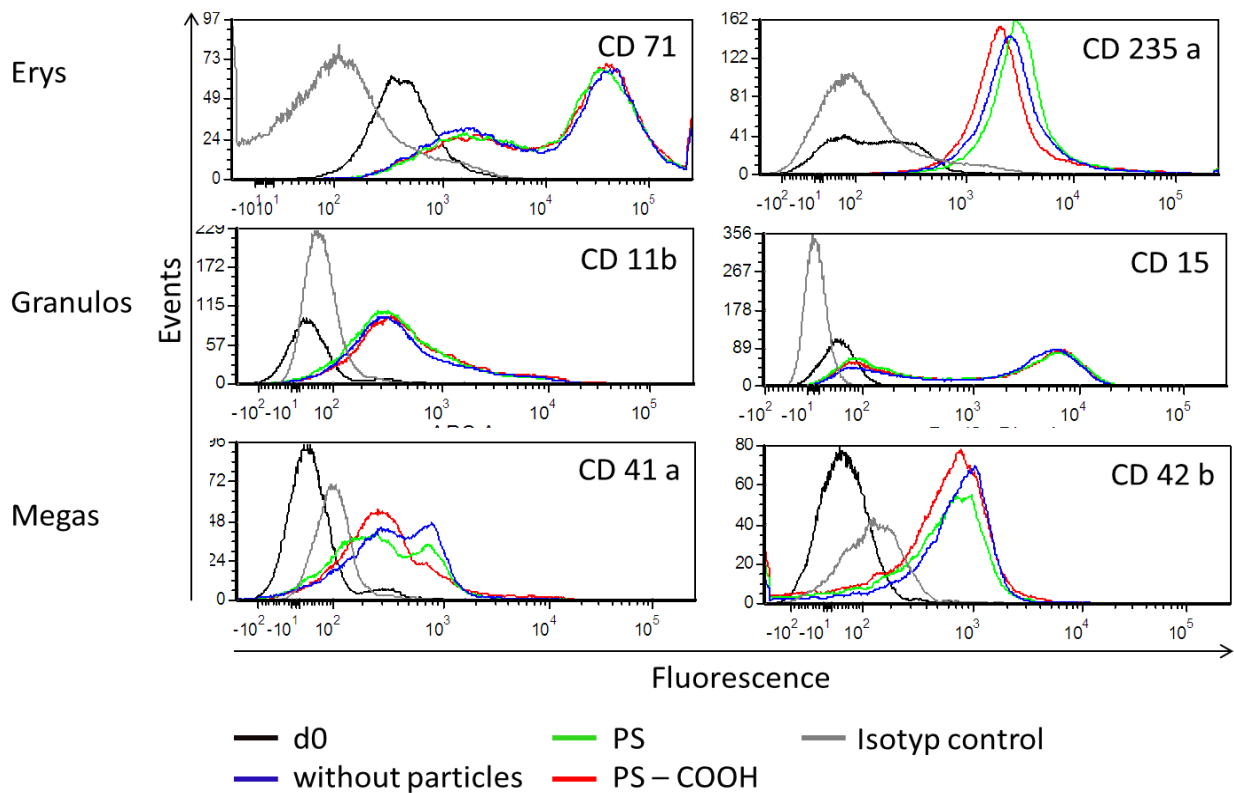

**Figure S5:** CD marker staining polystyrene particles. For erythropoiesis CD71 and CD235a were determined, while for granulopoiesis CD11b and CD15 were chosen. Megakaryopoiesis was demonstrated by CD41a and CD42b.

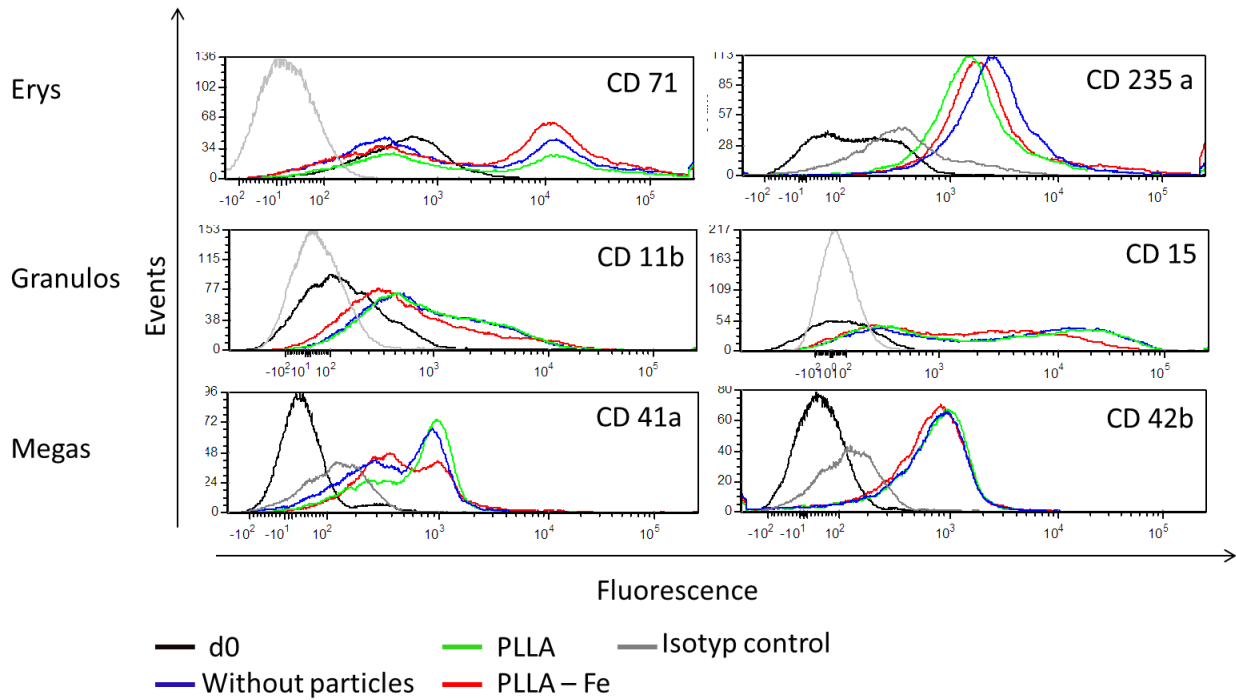

**Figure S6:** CD marker staining poly lactide particle. For erythropoiesis CD71 and CD235a were determined, while for granulopoiesis CD11b and CD15 were chosen. Megakaryopoiesis was demonstrated by CD41a and CD42b.

**Table S1:** Supplements used for hHSC lineage differentiation. SCF: stem cell factor; Flt3: Flt-3/Flk-2 ligand; EPO Erythropoietin, TPO Thrombopoietin.

|             | Erythropoiesis                                                       | Granulopoiesis                                                                               | Megakaryopoiesis                                    |
|-------------|----------------------------------------------------------------------|----------------------------------------------------------------------------------------------|-----------------------------------------------------|
| supplements | SCF (50 ng/mL)<br>Flt3 (50 ng/mL)<br>Il3 (10 ng/mL)<br>Epo (10 U/mL) | SCF (50 ng/mL)<br>Flt3 (50 ng/mL)<br>Il3 (10 ng/mL)<br>G-CSF (10 ng/mL)<br>GM-SCF (10 ng/mL) | SCF (50 ng/mL)<br>Flt3 (50 ng/mL)<br>TPO (20 ng/mL) |

**Table S2:** Primer sequences used for qPCR analysis of hHSCs.

| Target                                                            | Forward                   | Reverse                   | Product size (bp) | Annealing Temp °C |
|-------------------------------------------------------------------|---------------------------|---------------------------|-------------------|-------------------|
| RAP1GA1 (RAP1, GTPase activating protein 1)                       | ACAGGTCTAGTGCCTG<br>AGGG  | CCCTTGGGGTGGACA<br>AG     | 90                | 63                |
| GPE (Glycophorin E)                                               | CACACCAGTGGTACTT<br>GATGC | TGCACTAACTTCAGG<br>AGCCA  | 110               | 60                |
| CEACAM (Carcinoembryonic antigen related cell adhesion molecule1) | GAGAGGCCATTTTCTT<br>GTGG  | GGGACGTATTGGTGT<br>GAGGT  | 104               | 63                |
| IL2RA (Interleukin 2 receptor alpha)                              | TAGGCCATGGCTTTGA<br>ATGT  | ACTGCTCACGTTTCATC<br>ATGG | 96                | 63                |
| TREM2 (Triggering receptor expressed on myeloid cells)            | AGTCATAGGGGCAAGA<br>CACC  | CCGGCTGCTCATCTT<br>ACTCT  | 107               | 60                |

**Table S3:** Primer sequences used for qPCR analysis of hMSCs.

| Target                                            | Forward                       | Reverse                       | Product size (bp) | Annealing Temp °C |
|---------------------------------------------------|-------------------------------|-------------------------------|-------------------|-------------------|
| GAPDH (Glyceraldehyde 3-phosphate dehydrogenase)  | AATGAAGGGGTCATT<br>GATGG      | AAGGTGAAGGTCGGA<br>GTCAA      | 108               | 60                |
| B2M ( $\beta$ 2 microglobulin)                    | TCTCTGCTGGATGAC<br>GTGAG      | TAGCTGTGCTCGCGC<br>TACT       | 90                | 60                |
| FABP4 (fatty acid binding protein 4)              | TGATGATCATGTTAGG<br>TTTGGC    | TGGAAACTTGTCTCCA<br>GTGAA     | 106               | 60                |
| CIDE 3 (cell death-inducing DFFA-like effector c) | CAGTTGTGCCATCTTC<br>CTCC      | AAGGGCATCATGGCT<br>TACAG      | 109               | 60                |
| TIMP4 (TIMP metalloproteinase inhibitor 4)        | GGCTCGATGTAGTTG<br>CACAG      | ACGCCTTTTGA CTCTT<br>CCCT     | 125               | 60                |
| Osteopontin [1]                                   | CTC AGG CCA GTT<br>GCA GCC    | GCC ACA GCA TCT<br>GGG TAT TT | 177               | 60                |
| Alkaline phosphatase) 1                           | CCT CGG AAG ACA<br>CTC TGA CC | CCA CCA AAT GTG<br>AAG ACG TG | 61                | 60                |

## References

- [1] Tautzenberger, A.; Lorenz, S.; Kreja, L.; Zeller, A.; Musyanovych, A.; Schrezenmeier, H.; Landfester, K.; Mailänder, V.; Ignatius, A. *Biomaterials* **2010**, *31*, 2064–2071.
